# Supplementary material
Source: publisher site journal article supplement (https://www.spandidos-publications.com/8200/downloadSupplementary)
Supplement: Supplementary file 1 [file downloadSupplementary]

Table SI. Search strategy.

| Database                                | Search strategy                                                                                                                                                                                                                                                                                                                                                |
|-----------------------------------------|----------------------------------------------------------------------------------------------------------------------------------------------------------------------------------------------------------------------------------------------------------------------------------------------------------------------------------------------------------------|
| Cochrane                                | (“cancer pain” OR “malignant pain” OR “tumor pain” OR “oncologic pain” OR “neoplastic pain”) AND (“gabapentin” OR “Neurontin”) AND (“morphine” OR “oxycodone” OR “fentanyl” OR “tramadol” OR “codeine” OR “opioid”)                                                                                                                                            |
| PubMed                                  | (“cancer pain”[Title/Abstract] OR “tumor pain”[Title/Abstract] OR “oncologic pain”[Title/Abstract] OR “neoplastic pain”[Title/Abstract]) AND “gabapentin”[Title/Abstract] AND (“morphine”[Title/Abstract] OR “oxycodone”[Title/Abstract] OR “fentanyl”[Title/Abstract] OR “tramadol”[Title/Abstract] OR “codeine”[Title/Abstract] OR “opioid”[Title/Abstract]) |
| Web of Science                          | TS=(“cancer pain” OR “malignant pain” OR “tumor pain” OR “oncologic pain” OR “neoplastic pain”) AND TS=(“gabapentin” OR “Neurontin”) AND TS=(“morphine” OR “oxycodone” OR “fentanyl” OR “tramadol” OR “codeine” OR “opioid”)                                                                                                                                   |
| Embase                                  | (‘cancer pain’ OR ‘malignant pain’ OR ‘tumor pain’ OR ‘neoplastic pain’) AND (‘gabapentin’ OR ‘neurontin’) AND (‘morphine’ OR ‘oxycodone’ OR ‘fentanyl’ OR ‘tramadol’ OR ‘codeine’ OR ‘opioid’)                                                                                                                                                                |
| China National Knowledge Infrastructure | (‘cancer pain’ OR ‘malignant pain’ OR ‘tumor pain’ OR ‘neoplastic pain’) AND (‘gabapentin’ OR ‘neurontin’) AND (‘morphine’ OR ‘oxycodone’ OR ‘fentanyl’ OR ‘tramadol’ OR ‘codeine’ OR ‘opioid’)                                                                                                                                                                |
| Wanfang Data                            | (‘cancer pain’ OR ‘malignant pain’ OR ‘tumor pain’ OR ‘neoplastic pain’) AND (‘gabapentin’ OR ‘neurontin’) AND (‘morphine’ OR ‘oxycodone’ OR ‘fentanyl’ OR ‘tramadol’ OR ‘codeine’ OR ‘opioid’)                                                                                                                                                                |
| VIP                                     | (‘cancer pain’ OR ‘malignant pain’ OR ‘tumor pain’ OR ‘neoplastic pain’) AND (‘gabapentin’ OR ‘neurontin’) AND (‘morphine’ OR ‘oxycodone’ OR ‘fentanyl’ OR ‘tramadol’ OR ‘codeine’ OR ‘opioid’)                                                                                                                                                                |
